# Supplementary material for: Disentangling the roles of trauma and genetics in psychiatric disorders using an Electronic Health Records-based approach
Source: medRxiv preprint, doi:10.1101/2022.08.28.22279306, version 1 (2022-08-30)
Supplement: Supplementary Results [file 279306_file08.docx]

**Supplemental Results**

**Assessment of TSLEs and control phenotypes in relation to TRS and time since PTSD diagnosis**

To gain a more in-depth understanding of each TSLE/control and their relationship to PTSD, we calculated the average time since PTSD diagnosis that each individual was exposed to TSLEs/controls. In total, there were 16 TSLEs and 7 controls that had sufficient cases (>5) and matching time data to report (**Supplementary Figure 7**). For two of our positive controls: grief (averagedays=-64.52, SE=332.05) and stress (averagedays=-70.82, SE=571.67), the average days since PTSD diagnosis was closest to zero days out of all phenotypes (except homelessness: (averagedays=-2.33, SE=341.19), meaning they were likely reported together at the time of the hospital visit. Sleep disorders (averagedays=238.20, SE=1694.64) were farther from zero than the other positive controls, and had a large average standard error. Our negative controls -vaginal birth (averagedays=-1252.00, SE=1246.53), pregnancy (averagedays=402.62, SE=1741.56)- and null controls -physical exam (averagedays=-33.29, SE=2441.82), flu vaccination (averagedays=76.50, SE=717.93)- were less conclusive in their time-dependent relationship to PTSD diagnosis due to their large average standard errors (**Supplementary Figure 7**).

To further understand how TSLEs are recorded and distributed in our biobank population, we used our TRSto assess individuals with psychiatric diagnoses and Obstetrician-Gynecologists (OB-GYN) visits. We compared the TRSbetween individuals with at least 1 psychiatric diagnosis (using ICD10 codes) and patients without any psychiatric diagnosis (**Supplementary Figure 8**). We found that in both TRS (TRSEN, TRSFREQ), individuals with at least 1 psychiatric diagnosis had significantly (p<2.2x10-16) higher average TRS (TRSEN=0.480-1.923, TRSFREQ=1.213-4.619) than individuals without a psychiatric diagnosis (TRSEN=0.275-1.409, TRSFREQ=0.714-3.576). Similarly, we compared individuals with at least 1 visit to an OB-GYN to individuals without an OB-GYN visit (**Supplementary Figure 8**), and found that individuals who visited an OB-GYN experienced a significantly higher average TRS (TRSEN=0.838-2.024, TRSFREQ=2.057-5.067) than those who never visited an OB-GYN (TRSEN=0.259-1.543, TRSFREQ=0.713-3.755).
